# 1 The psychometric validation of the Dutch version 2 of the Rivermead Post-Concussion Symptoms 3 Questionnaire (RPQ) after Traumatic Brain Injury 4 (TBI)

5 *Short Title:* Psychometric Validation of the Dutch RPQ

6 Anne Marie C Plass<sup>1\*</sup>, Dominique Van Praag<sup>2</sup>, Amra Covic<sup>1</sup>, Anastasia Gorbunova<sup>1</sup>, Ruben  
7 Real<sup>1</sup>, Nicole von Steinbuechel<sup>1</sup>, and Dutch and Flemish CENTER TBI investigators.

8 <sup>1</sup>Institute of Medical Psychology and Medical Sociology, University Medical Center Göttingen (UMG)/  
9 Georg-August-University, Göttingen, Germany

10 <sup>2</sup>Department of Neurosurgery, Antwerp University Hospital and University of Antwerp, Edegem,  
11 Belgium

12

13 \*corresponding Author:

14 dr Anne Marie Plass, Ph.D,

15 Institute of Medical Psychology and Medical Sociology,

16 University Medical Centre Göttingen (UMG)/ Georg-August-University

17 Waldweg 37, Eingang A| 37073 Göttingen| Germany

18 (P)+49 551 39-8014/ -8192 (secretary)

19 (F) +49 551 39-8194|

20 (E) [annemarie.plass@med.uni-goettingen.de](mailto:annemarie.plass@med.uni-goettingen.de)

21

22

23 **Abstract**

24 *Background*

25 Traumatic brain injury (TBI) is one of the most common neurological conditions. It can have wide-  
26 ranging physical, cognitive and psychosocial effects. Most people recover within weeks to months after  
27 the injury, but a substantial proportion are at risk of developing lasting post-concussion symptoms.  
28 The Rivermead Post-Concussion Syndrome Questionnaire (RPQ) is a short validated 16-items self-  
29 report instrument to evaluate post-concussive symptoms. The aim of this study was to test  
30 psychometrics characteristics of the current Dutch translation of the RPQ.

31 *Methods*

32 To determine the psychometric characteristics of the Dutch RPQ, 472 consecutive patients six months  
33 after they presented with a traumatic brain injury in seven medical centers in the Netherlands ( $N=397$ ),  
34 and in two in Belgium (Flanders) ( $N=75$ ) took part in the study which is part of the large prospective  
35 longitudinal observational CENTER-TBI-EU-study. Psychometric properties at six months post TBI, were  
36 assessed using exploratory and confirmatory factor analyses. Sensitivity was analyzed by comparing  
37 RPQ scores of patients after mild vs. moderate and severe TBI.

38 *Findings*

39 The Dutch version of RPQ proved good, showing excellent psychometric characteristics: high internal  
40 consistency (Cronbach's  $\alpha$  .93), and good construct validity, being sensitive to self-reported recovery  
41 status at six months post TBI. Moreover, data showed a good fit to the three dimensions structure of  
42 separate cognitive, emotional and somatic factors ( $Chi^2=119$ ;  $df=117$ ;  $p=.4$ ; CFI=.99; RMSEA=.006),  
43 reported earlier in the literature.

44 *Discussion*

45 Psychometric characteristics of the Dutch version of RPQ proved excellent to good, and can the  
46 instrument therefore be applied for research purposes and in daily clinical practice.

47 **Wordcount Ab:** 252

48 **Keywords:** Rivermead Post-concussion symptoms Questionnaire (RPQ); Traumatic Brain Injury (TBI),  
49 Validation; Psychometric Properties, Post-Concussion (PCS)

50 **Wordcount bodytext:** 3,882

51 .

## 52 **Introduction**

53 Traumatic brain injury (TBI) is one of the most common neurological conditions, and occurs  
54 when an external force causes brain trauma (1). TBI can be classified as mild, moderate or  
55 severe, and may have wide-ranging physical and psychological effects (2–7). Some signs or  
56 symptoms appear immediately after the traumatic event, while others days or weeks later. In  
57 the Netherlands, about 85,000 people are confronted with a traumatic brain injury, on a  
58 yearly basis ([https://www.hersenstichting.nl/alles-over-hersenen/hersenaandoeningen/cijfers-](https://www.hersenstichting.nl/alles-over-hersenen/hersenaandoeningen/cijfers-over-patienten)  
59 [over-patienten](https://www.hersenstichting.nl/alles-over-hersenen/hersenaandoeningen/cijfers-over-patienten)). On average 30,000 of these seek help at the Emergency Room (ER) of the  
60 hospital, and about 21,000 require hospital stays (8). Yearly, about 1,000 die because of TBI  
61 (9). Most people suffer from mild TBI (mTBI), e.g. concussion, for which they often do not  
62 seek professional help, or seek advice from their General Practitioner (GP): In the Netherlands,  
63 the GP functions as gatekeeper to the rest of the medical system. (8). Virtually all non-  
64 institutionalized Dutch citizens are registered with a GP controlling access to specialized  
65 medical care. (10)

66 In about one third of the cases mTBI leads to long-term consequences (5,11). A  
67 substantial proportion (about 15-30%) of individuals after mTBI are at risk to developing  
68 post-concussion symptoms (2). These can be classified into four categories: cognitive  
69 difficulties (e.g. concentration and memory loss), behavioral maladaptation (e.g. impulsivity,

70 and aggressive behavior), psychiatric conditions (e.g. posttraumatic stress), and physical  
71 disorders (e.g. chronic pain) (11). Whether patients develop post-concussion symptoms, is  
72 associated with cognitive, emotional, behavioral and social risk factors, and does not  
73 necessarily depend on the severity of the traumatic brain injury, see fig 1 (2). Years of  
74 education, pre-injury psychiatric disorders, neck pain and prior TBI were found strong  
75 predictors of 6-month post-concussive symptoms (3,5), as were patient's perceptions of their  
76 brain injury, their behavioral responses, passive and avoidant coping styles and emotional  
77 distress in response to this (2,5).

78 As most people recover from their TBI within weeks to months after the injury, post-  
79 concussion symptoms might easily be overlooked, since these residual complaints may be  
80 deferred. Furthermore, imaging techniques often do not show any structural brain damage in  
81 this population (12,13). Still, one in three mTBI patients will not be able to resume work and  
82 activities six months after the event at a level similar to that before the accident(5). As a  
83 consequence, (m)TBI is associated with substantial ongoing disability and distress for  
84 patients, and high healthcare costs (2,8). A possible instrument for (early) identification in  
85 order to timely guide clinical management of post-concussion symptoms after TBI, is the  
86 Rivermead Post Concussion Syndrome Questionnaire (RPQ). The RPQ is a validated  
87 measurement-instrument to survey post-concussion symptoms, relying on self-report as to  
88 the presence and severity of 16 symptoms (14–17). The items form one scale, but were not  
89 always found to tap into the same underlying construct (3,4,14)). Eyres et al (2005) found no  
90 evidence for a single factor structure, and proposed to split the RPQ into two subscales  
91 consisting of the first three items 'RPQ3', representing immediate symptoms (headaches,  
92 dizziness, and nausea) and the remaining 13 items 'RPQ13', representing symptoms that  
93 might occur at a later stage. On the other hand, Lannsjö et al (2011) found strong support for

94 both a single and two factor structure in their RPQ validation study, but failed to reproduce  
95 the RPQ3/13 two-category model as suggested by Eyres et al (2005). Furthermore, a  
96 'rationally-based' three categories model was proposed by Smith-Seemiller and colleagues  
97 (2003), comprising of the following domains: 1. cognitive deficits (impaired memory, poor  
98 concentration, slow thinking), 2. somatic complaints (headaches, dizziness, nausea, blurred or  
99 double vision, noise or light sensitivity, sleep disturbance, fatigue), and 3. emotional  
100 complaints (irritably, depression, frustration, restlessness), serving as framework in various  
101 studies on post-concussion symptoms (3,18). The results of Potter and colleagues (2006)  
102 supported the existence of separate cognitive, emotional and somatic factors (17). So far, the  
103 RPQ has been validated in various languages (4,6), but until now this has not been the case  
104 for the Dutch version of this questionnaire. Therefore, this study aims to investigate the  
105 psychometric characteristics of the current Dutch translation of the RPQ.

## 106 **Methods**

### 107 *Study sample*

108 This study is part of the Collaborative European NeuroTrauma Effectiveness Research in TBI  
109 (CENTER-TBI) study, which is a prospective longitudinal observational study conducted in 72  
110 centers from 21 countries (8). In the Netherlands, patients were recruited from seven medical  
111 centers spread over the country: Leiden University Medical Center (LUMC), University Medical  
112 Center Groningen (UMCG), Erasmus MC Rotterdam, Radboud University medical center  
113 Nijmegen, Medical center Haaglanden The Hague, Elisabeth Hospital Tilburg, HAGA hospitals  
114 The Hague. Furthermore, two centers in the Dutch-speaking-part of Belgium (Flanders) were  
115 included in the study: the Antwerp University Hospital, and the University Hospital in Leuven.  
116 Patients that presented within 24 hours after brain injury at the hospital, that were diagnosed  
117 with TBI, and had a clinical indication for CT scan, were eligible for the study, and were all

118 invited to participate in this convenience sample. Those willing to participate provided written  
119 informed consent prior to inclusion. Patients with severe pre-existing neurological disorder  
120 that could confound the outcome assessment were excluded. A written informed consent to  
121 participate in the study was obtained at the time of inclusion. At six months post TBI, the  
122 nurse at the center administered the RPQ during a visit, or was sent by postal mail to those  
123 who did not need to attend the hospital, for completion at home. A pre-franked envelope  
124 was included to send it back.

### 125 *Translation of the Dutch RPQ*

126 Two native Dutch speakers who are proficient in English translated the RPQ into Dutch, after  
127 which a native English speaker, who is fluent in Dutch, backward translated the harmonized  
128 version. This version was then compared to the original English RPQ version possible  
129 differences were identified and resolved by the two parties. In addition, a team of researchers  
130 and CENTER-TBI collaborators refined and reshaped the measurement-instrument until  
131 consensus was reached, following an iterative process. This multiple-step procedure resulted  
132 in a final version of the Dutch RPQ.

### 133 *Ethical Approval*

134 The CENTER-TBI study (EC grant 602150) has been conducted in accordance with all relevant  
135 laws of the EU if directly applicable or of direct effect, and all relevant laws of the country  
136 where the Recruiting sites were located, including, but not limited to, the relevant privacy and  
137 data protection laws and regulations (the "Privacy Law"), the relevant laws and regulations on  
138 the use of human materials, and all relevant guidance relating to clinical studies from time to  
139 time in force including, but not limited to, the ICH Harmonised Tripartite Guideline for Good  
140 Clinical Practice (CPMP/ICH/135/95) ("ICH GCP") and the World Medical Association

141 Declaration of Helsinki entitled “Ethical Principles for Medical Research Involving Human  
142 Subjects”. Ethical approval was obtained for each recruiting site. Informed Consent was  
143 obtained for all patients recruited in the Core Dataset of CENTER-TBI and documented in the  
144 e-CRF. The list of sites, Ethical Committees, approval numbers and approval dates can be  
145 found on the official Center TBI website ([www.center-tbi.eu/project/ethical-approval](http://www.center-tbi.eu/project/ethical-approval)).

#### 146 *Measurement-Instrument*

147 The Rivermead Post-Concussion Questionnaire (RPQ) consists of 16 common symptoms  
148 related to post concussion. Patients are asked to rate how problematic symptoms were  
149 compared to the situation before the head injury on a 5-point Likert scale (0-4). A score of 0  
150 indicating ‘not experienced at all; 1 indicating ‘no more of a problem (than before)’, 2  
151 indicating ‘a mild problem’; 3 indicating ‘a moderate problem; 4 indicating ‘a severe problem’  
152 (14). Scores are taken as sum of all symptom scores, excluding scores of 1, as these indicate  
153 symptoms are unchanged since the brain injury. This gives a potential total score range of 0  
154 (representing no change in symptoms since the head injury) to 64 (most severe symptoms)  
155 (4). If more than 5 of the items were missing from the 16, a score was not calculated and  
156 treated as missing. The RPQ total score is calculated using prorating as imputation method, if  
157 up to one third of the items were missing. In addition, the RPQ scoring method of Stulemeijer  
158 et. al. (2008) was applied where a score of highest 2 (a mild problem) to at least 13 of the 16  
159 items is defined a favorable outcome. Stulemeijer et al (2008) showed that 94% of non-brain-  
160 injured patients (wrist-, or ankle distortion) would meet this criterion (19).

161 Further, TBI severity was rated using the Glasgow Coma Scale (GCS), with scores  
162 between 3-8 indicating severe, 9-12 moderate, and 13-15 mild TBI (20–24). The GCS was  
163 administered within the first 24 hours after the brain injury occurred. Current disability was  
164 assessed by administering the extended Glasgow Outcome Scale (GOSE) (25). GOSE scores

165 were used to differentiate between patients with remaining severe disability (3-4), moderate  
166 disability (5-6), and good recovery (21,22). In addition, socio- demographic data were  
167 collected, including gender, age, working status, education level, etc.

### 168 *Analyses*

169 The psychometric characteristics of the Dutch version of the RPQ were determined at six  
170 months post TBI, using SPSS version 24, AMOS version 24, and R version 3.3.3 to performing  
171 classical and modern test-theory analyses.

172 Internal consistency was determined by calculating Cronbach's alpha, including the  
173 scale if any item were deleted. To testing construct validity, Principal Axis Factoring (PAF) was  
174 done by unweighted least squares and oblimin rotation on the 16 RPQ items, exploring the  
175 underlying constructs in the Dutch version of the RPQ, as no consistent underlying factor  
176 structure has been established so far. Items were included if the factor loading was 0.5 or  
177 higher and if factor loadings on the other factors were 0.1 or lower. Confirmatory factor  
178 analysis (CFA) was used to examine the fit of the Dutch RPQ data to the various factor  
179 structures that had been described earlier in literature: For this, we used the single model  
180 factor, reflecting post-concussion symptoms as unitary entity (15); the RPQ3 and RPQ13 two  
181 factor model (4); and the three factor model (17,18).

182 Concurrent criterion validity was assessed by analyzing the influence of important  
183 covariates on RPQ scores (GCS, GOSE) using t-tests and one-way ANOVA. Descriptive  
184 analyses were performed for sociodemographic variables (gender, age, education level, etc.).  
185 Although people in The Netherlands and Flanders (Belgium) both speak Dutch, the language  
186 used differs, and words might have a different meaning. Therefore, all tests were performed  
187 both for the entire research sample and for each country separately where possible.



## 188 **Results**

### 189 *Sample*

190 In total 472 patients filled in the Dutch version of the RPQ at six months post TBI. Of these,  
191 397 were administered in the Netherlands and 75 in Belgium. Twenty-five participants were  
192 aged under 18 (18 in the Netherlands, and seven in Belgium) and were excluded from this  
193 study. Country of residence was registered for 437 patients, who were either living in Belgium  
194 (N=67), or the Netherlands (N= 368), apart from two in Nepal. Not all respondents were born  
195 in the Netherlands or Belgium (see table 1), but since their understanding of the Dutch  
196 language was sufficient to fill in the RPQ, and since they currently were living in the  
197 Netherlands or Flanders, they were not excluded from the study. There were 277/ 447 (62%)  
198 male respondents (resp. 231/ 379 (60.9%) in the Netherlands, and 46/ 68 (67.6%) in Belgium).  
199 The vast majority of the study population (68.2%) belonged to the middle aged and older  
200 age groups (38% was aged 45-65, 30.2% 65 and up). More than half were higher educated  
201 (64.2%), and were either married or living together (56.6%). Nearly half were not, or no longer  
202 employed (48.4%), see table 2 for further details. There were no significant differences in total  
203 RPQ scores at six months post TBI for study participants in the Netherlands ( $M=12.63$ ;  
204  $SD=13.77$ ) and participants in Belgium ( $M=12.64$ ;  $SD=11.94$ ;  $t(445)=-110$ ;  $p=.9$ ). The  
205 magnitude of the differences in the means was very small (eta squared < .0001).

206 At the time of the injury, 13.4% (N=60) of the study population solely attended the ER  
207 without further hospitalization. 52.6% (N=235) were hospitalized, and 34 % (N=152) needed  
208 a stay in the ICU. Initially, within 24 hours after TBI, 80.5% (N=316) were diagnosed mTBI,  
209 5.8% (N=21) were diagnosed moderate TBI, and 6.4% (N=23) with severe TBI. Of 87  
210 respondents (19.5%) these data were missing. Six months after the brain injury, GOSE scores  
211 reveal that 55.5% (N=248) of the respondents showed good recovery, 25% (N=112) reported

212 moderate disabilities, and 6.7% (N=30) suffered from severe disabilities at that point in time.  
213 Of 57 respondents (12.8%) these data were missing. Those patients that solely attended the  
214 ER without further hospitalization, all were initially diagnosed mTBI (see Table 3a). Of 313  
215 respondents all three data types were available (hospitalization, initial diagnosis and six  
216 months post recovery status), see table 3b for further descriptives.

### 217 *Factor analyses*

218 Prior to performing PAF the suitability of data for factor analyses was assessed. Inspection of  
219 the correlation matrix revealed the presence of many coefficients of .3 and above. The Kaiser-  
220 Meyer-Okin (KMO) value was .94, exceeding the recommended value of .6 (Kaiser 1970,  
221 1974) and the Barlett's Test of sphericity (Barlett, 1954) reached statistical significance ( $p$   
222  $<.0001$ ), supporting the factorability of the correlation matrix. PAF, using Oblimin rotation,  
223 revealed the presence of three components with eigenvalue exceeding 1, explaining 47.7%,  
224 5.0%, and 4.0% of the variance respectively. The scree plot revealed a clear break after the  
225 first component, see figure 2. Moreover, all items except for three (nausea (.42), blurred vision  
226 (.42) and double vision (.34)) show factor loadings of .5 and up on the first factor, but high  
227 factor loadings ( $>.1$ ) on at least one of the other factors too. Confirmatory Factor analysis  
228 (CFA) was run to testing model fit to possible underlying factor structures that had been  
229 described in literature earlier (4,6,17,18). A central assumption is that the data are distributed  
230 normally. However, substantial problems with univariate skew and kurtosis were identified,  
231 see table 4. To correct for this data were dichotomized, computing 0 and 1 responses into 0,  
232 and 2, 3, and 4 into 1. Following this, CFA indicated a lack of fit to unitary model, given the  
233 significant Chi-squares (15) ( $Chi^2=285.5$ ;  $df=120$ ;  $p<.001$ ; CFI=.99; RMSEA=.06), and a lack of  
234 fit to the RPQ3/ RPQ13 two component model(4) ( $Chi^2=271$ ;  $df=119$ ;  $p<.001$ ; CFI=.99;

235 RMSEA=.05), but showed a good fit to the three factor structure(18) ( $Chi^2=119$ ;  $df=117$ ;  $p=.4$ ;  
236 CFI=.99; RMSEA=.006). The Belgian sample was too small to performing separate CFAs.

### 237 *Quality Criteria*

238 The RPQ showed high consistency with Cronbach's alpha being .93. For the sample in the  
239 Netherlands Cronbach's alpha was .94, and for the sample in Belgium Cronbach's was alpha  
240 .91. The scale did not improve if any items were deleted. Spearman Brown Coefficient  $r_{sb1}$  was  
241 .91). Further, item characteristics showed high item correlations (>.55, except for double  
242 vision and nausea), and acceptable asymmetry for all items but double vision (skewness  
243 being 2.6), see table 5

### 244 *Concurrent Criterion validity*

245 RPQ total scores at six months post TBI of patients (self-)reporting severe ( $M=20.7$ ;  $SD=18.3$ ;  
246  $N=30$ ) or moderate ( $M=20.2$ ;  $SD=13.9$ ;  $N=112$ ) disabilities according to their total scores on  
247 the GOSE scale, differed significantly to those that showed good recovery at this point in time  
248 ( $M=8.3$ ;  $SD=10.6$ ;  $N=248$ ) ( $F(2, 387)=42.7$ ;  $p<.001$ ). RPQ total scores at six months post TBI  
249 further were found to differentiate between initial mTBI ( $M=11.6$ ;  $SD=13.2$ ;  $N=316$ ) and  
250 moderate TBI ( $M=20.2$ ;  $SD=16.8$ ;  $N=21$ ) diagnoses (GCS-scores) ( $F(2, 357)=4.5$ ;  $p=.012$ ) .  
251 Remarkably, RPQ total scores of those initially diagnosed with severe TBI ( $M=14.8$ ,  $SD =13.9$ ;  
252  $N=23$ ), resembled most those initially diagnosed with mTBI (*NS*). When recalculating RPQ  
253 total score into favorable (a score of highest 2 to at least 13 of the 16 items (26)) vs  
254 unfavorable, 74.7% ( $N=334$ ) of the study population had a favorable outcome at six months  
255 post TBI, indicating that the symptoms reported, do not differ from what can be found in a  
256 non-TBI population (26,27). 25.3% ( $N=113$ ) still had an unfavorable, strongly related to TBI,

257 outcome. The RPQ score was found to discriminate between recovery status (GOSE scores) at  
258 six months post TBI ( $Chi^2=45.2$ ;  $df=2$ ;  $p<.001$ ), although not strongly ( $Cramer's V =.11$ ).  
259 When solely taking the sample from the Netherlands into account, a stronger relationship  
260 between favorable and unfavorable RPQ outcomes and recovery status (GOSE scores) at six  
261 month post TBI was found ( $Cramer's V =.35$ ,  $Chi^2=43.8$ ;  $df=2$ ;  $p<.001$ ). Further, the RPQ total  
262 scores at six months post TBI of the Dutch sample were found to discriminate between  
263 recovery status (GOSE scores) at six months post TBI ( $F(2, 358)=39.2$ ;  $p<.001$ ), and initial  
264 diagnoses within 24 hours after the brain injury occurred (GCS Scores) ( $F(2, 299)=3.7$ ;  $p=.3$ ).  
265 The number of participants from Belgium that could be included in these analyses were too  
266 low for further analyses.

## 267 **Discussion**

268 The current Dutch translation of the RPQ showed good psychometric characteristics, with  
269 high internal consistency, and good construct validity. As for these aspects, it can be applied  
270 for research purposes and in daily clinical practice, as an instrument to identify post-  
271 concussion symptoms. Besides, it proved sensitive for recovery status at six months post TBI,  
272 showing that those who (self-) reported moderate or severe disabilities six months after the  
273 brain injury took place, had significant lower RPQ total scores compared to those reporting  
274 good recovery at that time point. Further, RPQ total scores at six months post TBI were found  
275 to distinguish between initial TBI diagnoses: Those initially diagnosed with moderate TBI had  
276 higher RPQ total (sum) scores at six months post TBI compared to those initially diagnosed  
277 with mild TBI (mTBI). However, the number of people in our research sample that were  
278 initially diagnosed with moderate TBI was low. Moreover, RPQ total scores at six months post  
279 TBI of those initially diagnosed with severe TBI resembled more the total score of those  
280 diagnosed with mTBI, rather than those with moderate TBI. A possible explanation for this

281 might be that moderate TBI and the amount of care needed was underestimated. This type of  
282 TBI might need more intensive care than what was provided. However, again the number of  
283 people in this group was too low to base further conclusions upon. Another explanation for  
284 this might be that the large number of mTBI-diagnosed patients who were admitted to the  
285 ICU, needed intensive care because of other injuries, and thus were diagnosed mTBI correctly.

286 Consistent with the findings of others, we found multidimensionality as underlying  
287 structure of the RPQ measurement-instrument (3,4,6,17,18,26). However, high factor loadings  
288 of items on multiple factors, and the clear break after the first factor in the scree plot, would  
289 suggest a one factor structure rather than multidimensionality. Confirmative factor analyses  
290 on the other hand revealed that our data would fit best to the three-component model  
291 dividing the RPQ post-concussion symptoms into the following three categories: 1. cognitive  
292 deficits (impaired memory, poor concentration, slow thinking), 2. somatic complaints  
293 (headaches, dizziness, nausea, blurred or double vision, noise or light sensitivity, sleep  
294 disturbances), and 3. emotional complaints (irritably, depression, frustration, restlessness).  
295 Small differences were found between the Belgium and Dutch sample, with only the Dutch  
296 sample showing a good fit to this model. However the number of respondents in the Belgium  
297 sample was below 250, due to which the criteria for model fit may not be valid (28).

298 The variation in underlying structure of the RPQ differs between studies and countries  
299 and might be due to various reasons. One reason could be the convenience sample used for  
300 this research. Another explanation might be the different analyses techniques used in the  
301 various studies, as modern techniques often tend to disqualify measurement-instrument  
302 validity that had been established before by classical analyses methods (29). A third possible  
303 explanation underpinning this may be the way in which measurement-instruments are being  
304 translated in accordance to the WHO guidelines of forward and back translation (30). In order

305 not to lose the potential to comparing data, researchers prefer to stay as close as possible to  
306 the original version. However, through this, the principles of cultural interpretation and  
307 translating the correct meaning of the items, might be missed out, due to which country  
308 differences might occur, even though the instrument used is very similar. (31,32).

309 In addition, we argue that despite the underlying multidimensionality found, the  
310 Dutch version of the RPQ needs not necessarily be divided into subscales when applied for  
311 research purposes and in daily clinical practice. The underlying multidimensionality might  
312 indicate that post-concussion symptoms represent more than one dimension, but factors  
313 highly correlated, and items were not unique for just one of the factors. Moreover, there is a  
314 large body of evidence that supports the use of total scores of scales to which  
315 multidimensionality is a precondition, e.g. attitude scales that usually exist of a cognitive and  
316 affective component(33). Furthermore, as the psychometric properties of the Dutch version of  
317 the RPQ proved good, it would be of interest to implement this measurement-instrument  
318 into primary care settings, in order to timely recognize the possible long-term consequences  
319 of TBI. This would especially be effective in countries as the Netherlands where one has to  
320 see the GP first, before entering the rest of the medical system, the so-called gatekeeper  
321 system, and in ER settings, where people usually are only checked medically and then send  
322 home, in order to timely identify potential patients at risk. However, more clarity is needed on  
323 how to best interpret RPQ scores(17), since similar symptoms can too be reported by those  
324 suffering from different injuries and, disorders, or by members of the general population as  
325 fatigue, headaches, nausea etc., are very common. As such, Stulemeijer and colleague (2016)  
326 found that 94% of non-TBI patients with wrist or ankle distortion too score positive on a  
327 maximum of three RPQ items.

328 *Limitations:* At six months post TBI, three quarters of the research sample no longer showed  
329 post-concussion symptoms, due to which data were skewed and not normally distributed.  
330 Validation of the RPQ at this point in time might therefore be difficult. Further, items were  
331 strongly correlated, due to which items strongly loaded on one and the same factor. Another  
332 limitation of this study was the limited Belgian sample, which was often too small for sound  
333 complex analyses, such as CFA. Further, the lacking of a construct validation phase making  
334 use of cognitive interviewing limits the overall conclusion on validity of the Dutch version of  
335 the RPQ, especially since there were between-country differences. Knowing what our  
336 respondents think we are asking, and knowing how they interpret the questions we are  
337 asking might help to explain the variety in underlying symptom structure found too (29).  
338 Moreover, the response scale used (0-4) might be confusing since patients might find the  
339 following order of the score of zero indicating 'no problem', and the score of one indicating  
340 'no more of a problem' difficult to understand, as a more natural following order would be:  
341 zero indicating no problem, and one indicating a small problem. Last, the convenience  
342 hospital sample used in this study might be limited representative to the entire mTBI  
343 population, as most people in the Netherlands tend not to seek specialized medical help for  
344 their head injury.

## 345 **Conclusion**

346 The psychometric characteristics of the Dutch version of RPQ proved good, showing high  
347 consistency, and good construct validity, being sensitive to self-reported recovery status at  
348 six months post TBI and initial TBI-diagnosis sensitive. The Dutch version of the RPQ can  
349 therefore be applied for research purposes and in daily clinical practice. Further discussion is  
350 needed with regard to the scoring of the RPQ, as underlying multidimensionality may not  
351 necessarily stand in the way of using a total score.

352

## 353 **Acknowledgements**

354 The research leading to these results was supported by the European Union's Seventh  
355 Framework Programme (FP7/2007-2013) under *grant agreement* n° 602150 (CENTER-TBI).  
356 Additional support for CENTER-TBI was received from the Hannelore Kohl Stiftung. The  
357 authors would like to thank all patients that were willing to participate in the study and all  
358 CENTER-TBI investigators and their staff for completing the provider profiling questionnaires.  
359 Those particularly involved in this paper are listed underneath.

360 Principal Investigators and contact information: Professor A.I. Maas: Andrew.Maas@azu.be; Professor D. Menon:  
361 dkm31@wbic.cam.ac.uk.

362 Ardon Hilko<sup>3</sup>, Bartels Ronald<sup>4</sup>, Carpenter K<sup>5</sup>, Covic Amra<sup>1</sup>, Cnossen Maryse<sup>6</sup>, De Keyser Véronique<sup>2</sup>, De Ruiter  
363 Godard C.W<sup>23</sup>, Depreitere Bart<sup>7</sup>, Dippel Diederik<sup>8</sup>, Engemann Heiko<sup>1</sup>, Foks Kelly<sup>8</sup>, Geleijns Karin<sup>5</sup>, Haagsma Juanita  
364 A.<sup>6</sup>, Haitisma Iain<sup>10</sup>, Hoedemaekers Astrid<sup>11</sup>, Jacobs Bram<sup>12</sup>, Janssens Koen<sup>2</sup>, Kalala Jean-Pierre<sup>13</sup>, Ketharanathan  
365 Naomi<sup>5</sup>, Kompanje Erwin<sup>14</sup>, Lecky Fiona<sup>15</sup>, Lingsma Hester<sup>6</sup>, Loeckx Dirk<sup>16</sup>, Luijten-Arts Chantal<sup>11</sup>, Maas Andrew  
366 I.R.<sup>2</sup>, Menon David<sup>9</sup>, Menovsky Tomas<sup>2</sup>, Schoonman Guus<sup>20</sup>, Oldenbeuving Annemarie<sup>17</sup>, Parizel Paul M.<sup>18</sup>, Peul  
367 Wilco<sup>19</sup>, Polinder Suzanne<sup>6</sup>, Pullens Pim<sup>18</sup>, Roks Gerwin<sup>20</sup>, Ruiz de Arcaute Felix<sup>16</sup>, Schipper Inger<sup>21</sup>, Sir Özcan<sup>22</sup>,  
368 Smakman Lidwien<sup>23</sup>, Smeets Dirk<sup>16</sup>, Steyerberg Ewout W.<sup>6</sup>, Tibboel Dick<sup>5</sup>, Vande Vyvere Thijs<sup>16</sup>, Van Der Jagt  
369 Mathieu<sup>25</sup>, Van Der Naalt Joukje<sup>12</sup>, Van Dijck Jeroen<sup>24</sup>, Van Hecke Wim<sup>16</sup>, Van Vlierberghe Eline<sup>16</sup>, Verheyden Jan<sup>16</sup>,  
370 Wildschut Eno<sup>5</sup>, Van Essen Thomas A.<sup>19</sup>, Van Praag Dominique<sup>2</sup>, Van Roost Dirk<sup>13</sup>, Vleggeert-Lankamp Carmen<sup>23</sup>,  
371 Volovici Victor<sup>10</sup>, Von Steinbüchel Nicole<sup>1</sup>.

372 <sup>1</sup> Institute of Medical Psychology and Medical Sociology, Universitätsmedizin Göttingen, Göttingen, Germany

373 <sup>2</sup> Department of Neurosurgery, Antwerp University Hospital and University of Antwerp, Edegem, Belgium

374 <sup>3</sup> Department of Neurosurgery, Elisabeth-Tweesteden Ziekenhuis, Tilburg, the Netherlands

375 <sup>4</sup> Department of Neurosurgery, Radboud University Medical Center, The Netherlands

376 <sup>5</sup> Intensive Care and Department of Pediatric Surgery, Erasmus Medical Center, Sophia Children's Hospital,  
377 Rotterdam, The Netherlands

378 <sup>6</sup> Department of Public Health, Erasmus Medical Center-University Medical Center, Rotterdam, The Netherlands

379 <sup>7</sup> Department of Neurosurgery, University Hospitals Leuven, Leuven, Belgium

380 <sup>8</sup> Department of Neurology, Erasmus MC, Rotterdam, the Netherlands

381 <sup>9</sup> Division of Anaesthesia, University of Cambridge, Addenbrooke's Hospital, Cambridge, UK

382 <sup>10</sup> Department of Neurosurgery, Erasmus MC, Rotterdam, the Netherlands



383 <sup>11</sup> Department of Intensive Care Medicine, Radboud University Medical Center, The Netherlands

384 <sup>12</sup> Department of Neurology, University Medical Center Groningen, Groningen, Netherlands

385 <sup>13</sup> Department of Neurosurgery, UZ Gent, Gent, Belgium

386 <sup>14</sup> Department of Intensive Care and Department of Ethics and Philosophy of Medicine, Erasmus Medical Center,  
387 Rotterdam, The Netherlands

388 <sup>15</sup> Emergency Medicine Research in Sheffield, Health Services Research Section, School of Health and Related  
389 Research (SchARR), University of Sheffield, Sheffield, UK

390 <sup>16</sup> icoMetrix NV, Leuven, Belgium

391 <sup>17</sup> Department of Intensive Care, Elisabeth-Tweesteden Ziekenhuis, Tilburg, the Netherlands

392 <sup>18</sup> Department of Radiology, Antwerp University Hospital and University of Antwerp, Edegem, Belgium

393 <sup>19</sup> Dept. of Neurosurgery, Leiden University Medical Center, Leiden, The Netherlands and Dept. of Neurosurgery,  
394 Medical Center Haaglanden, The Hague, The Netherlands

395 <sup>20</sup> Department of Neurology, Elisabeth-TweeSteden Ziekenhuis, Tilburg, the Netherlands

396 <sup>21</sup> Department of Traumasurgery, Leiden University Medical Center, Leiden, The Netherlands

397 <sup>22</sup> Department of Emergency Care Medicine, Radboud University Medical Center, The Netherlands

398 <sup>23</sup> Neurosurgical Cooperative Holland, Department of Neurosurgery, Leiden University Medical Center and Medical  
399 Center Haaglanden, Leiden and The Hague, The Netherlands

400 <sup>24</sup> Department of Neurosurgery, The HAGA Hospital, The Hague, The Netherlands

401 <sup>25</sup> Department of Intensive Care, Erasmus MC, Rotterdam, the Netherlands

402

## 403 Funding Statement

404 Data used in preparation of this manuscript were obtained in the context of CENTER-TBI, a  
405 large collaborative project with the support of the European Commission 7th Framework  
406 program (602150). The funder had no role in study design, data collection and analysis,  
407 decision to publish, or preparation of the manuscript.

## 408 Data Availability

409 There are however legal constraints that prohibit us from making the data available. Since  
410 there are only a limited number of centers per country included in this study (for two

411 countries only one center), data will be identifiable. Readers may contact Dr Hester Lingsma  
412 ([h.lingsma@erasmusmc.nl](mailto:h.lingsma@erasmusmc.nl)) for requests for the data.

413

## 414 **References**

- 415 1. Menon DK, Schwab K, Wright DW, Maas AI. Position Statement: Definition of Traumatic Brain  
416 Injury. *Arch Phys Med Rehabil*. 2010 Nov 1;91(11):1637–40.
- 417 2. Hou R, Moss-Morris R, Peveler R, Mogg K, Bradley BP, Belli A. When a minor head injury results in  
418 enduring symptoms: a prospective investigation of risk factors for postconcussional syndrome  
419 after mild traumatic brain injury. *J Neurol Neurosurg Psychiatry*. 2012 Feb;83(2):217–23.
- 420 3. Cnossen MC, Winkler EA, Yue JK, Okonkwo DO, Valadka A, Steyerberg EW, et al. Development of  
421 a Prediction Model for Post-Concussive Symptoms following Mild Traumatic Brain Injury: A  
422 TRACK-TBI Pilot Study. *J Neurotrauma*. 2017 Mar 27;
- 423 4. Eyres S, Carey A, Gilworth G, Neumann V, Tennant A. Construct validity and reliability of the  
424 Rivermead Post-Concussion Symptoms Questionnaire. *Clin Rehabil*. 2005 Dec;19(8):878–87.
- 425 5. van der Naalt J, Timmerman ME, de Koning ME, van der Horn HJ, Scheenen ME, Jacobs B, et al.  
426 Early predictors of outcome after mild traumatic brain injury (UPFRONT): an observational cohort  
427 study. *Lancet Neurol*. 2017 Jul;16(7):532–40.
- 428 6. Lannsjö M, Borg J, Björklund G, Af Geijerstam J-L, Lundgren-Nilsson A. Internal construct validity  
429 of the Rivermead Post-Concussion Symptoms Questionnaire. *J Rehabil Med*. 2011  
430 Nov;43(11):997–1002.
- 431 7. Majdan M, Plancikova D, Maas A, Polinder S, Feigin V, Theadom A, et al. Years of life lost due to  
432 traumatic brain injury in Europe: A cross-sectional analysis of 16 countries. *PLoS Med*. 2017  
433 Jul;14(7):e1002331.
- 434 8. Nijman S. Traumatic Brain Injury. Accident figures [In Dutch: 'Traumatisch Hersenletsel.  
435 Ongevalcijfers'] [Internet]. VeiligheidNL; 2013. Available from: [http://docplayer.nl/1487821-](http://docplayer.nl/1487821-Traumatisch-hersenletsel.html)  
436 [Traumatisch-hersenletsel.html](http://docplayer.nl/1487821-Traumatisch-hersenletsel.html)
- 437 9. Zadok J. Numbers, causes, and consequences non-congenital brain damage. [In Dutch: 'Aantallen,  
438 oorzaken en gevolgen niet-aangeboren hersenletsel'] [Internet]. Hersenz; 2015. Available from:  
439 [http://www.hersenz.nl/sites/all/files/pdf/factsheet\\_aantallen\\_oorzaken\\_en\\_gevolgen\\_niet-](http://www.hersenz.nl/sites/all/files/pdf/factsheet_aantallen_oorzaken_en_gevolgen_niet-aangeboren_hersenletsel.pdf)  
440 [aangeboren\\_hersenletsel.pdf](http://www.hersenz.nl/sites/all/files/pdf/factsheet_aantallen_oorzaken_en_gevolgen_niet-aangeboren_hersenletsel.pdf)
- 441 10. van den Dungen C, Hoeymans N, Gijsen R, van den Akker M, Boesten J, Brouwer H, et al. What  
442 factors explain the differences in morbidity estimations among general practice registration  
443 networks in the Netherlands? A first analysis. *Eur J Gen Pract*. 2008;14 Suppl 1:53–62.
- 444 11. Factsheet Non-congenital Brain Damage (NBD) [In Dutch: 'Factsheet Niet-aangeboren  
445 hersenletsel (NAH)'] [Internet]. Vilans; 2015. Available from:  
446 [http://www.kennispleinchronischezorg.nl/docs/KCZ/Factsheet\\_Niet-](http://www.kennispleinchronischezorg.nl/docs/KCZ/Factsheet_Niet-aangeboren_hersenletsel_NAH_eerstelijnszorg_Vilans.pdf)  
447 [aangeboren\\_hersenletsel\\_NAH\\_eerstelijnszorg\\_Vilans.pdf](http://www.kennispleinchronischezorg.nl/docs/KCZ/Factsheet_Niet-aangeboren_hersenletsel_NAH_eerstelijnszorg_Vilans.pdf)

- 448 12. Yuh EL, Mukherjee P, Lingsma HF, Yue JK, Ferguson AR, Gordon WA, et al. Magnetic resonance  
449 imaging improves 3-month outcome prediction in mild traumatic brain injury. *Ann Neurol*. 2013  
450 Feb;73(2):224–35.
- 451 13. Yuh EL, Hawryluk GWJ, Manley GT. Imaging concussion: a review. *Neurosurgery*. 2014 Oct;75  
452 Suppl 4:S50–63.
- 453 14. King NS. Emotional, neuropsychological, and organic factors: their use in the prediction of  
454 persisting postconcussion symptoms after moderate and mild head injuries. *J Neurol Neurosurg*  
455 *Psychiatry*. 1996 Jul;61(1):75–81.
- 456 15. King NS, Crawford S, Wenden FJ, Moss NE, Wade DT. The Rivermead Post Concussion Symptoms  
457 Questionnaire: a measure of symptoms commonly experienced after head injury and its  
458 reliability. *J Neurol*. 1995 Sep;242(9):587–92.
- 459 16. King NS, Crawford S, Wenden FJ, Caldwell FE, Wade DT. Early prediction of persisting post-  
460 concussion symptoms following mild and moderate head injuries. *Br J Clin Psychol*. 1999 Mar;38 (  
461 Pt 1):15–25.
- 462 17. Potter S, Leigh E, Wade D, Fleminger S. The Rivermead Post Concussion Symptoms  
463 Questionnaire: a confirmatory factor analysis. *J Neurol*. 2006 Dec;253(12):1603–14.
- 464 18. Smith-Seemiller L, Fow NR, Kant R, Franzen MD. Presence of post-concussion syndrome  
465 symptoms in patients with chronic pain vs mild traumatic brain injury. *Brain Inj*. 2003  
466 Mar;17(3):199–206.
- 467 19. Stulemeijer M, Van der Werf S, Borm GF, Vos PE. Early prediction of favourable recovery 6  
468 months after mild traumatic brain injury. *J Neurol Neurosurg Psychiatry*. 2008;79(8):936–942.
- 469 20. von Steinbüchel N, Wilson L, Gibbons H, Hawthorne G, Höfer S, Schmidt S, et al. Quality of Life  
470 after Brain Injury (QOLIBRI): scale validity and correlates of quality of life. *J Neurotrauma*. 2010  
471 Jul;27(7):1157–65.
- 472 21. Teasdale G, Maas A, Lecky F, Manley G, Stocchetti N, Murray G. The Glasgow Coma Scale at 40  
473 years: standing the test of time. *Lancet Neurol*. 2014;13(8):844–854.
- 474 22. Teasdale G, Jennett B. Assessment of coma and impaired consciousness: a practical scale. *The*  
475 *Lancet*. 1974;304(7872):81–84.
- 476 23. Castaño-León AM, Navarro-Main B, Gomez PA, Gil A, Soler MD, Lagares A, et al. Quality of Life  
477 After Brain Injury: Psychometric Properties of the Spanish Translation of the QoLIBRI. *Eval Health*  
478 *Prof*. 2017;0163278717702696.
- 479 24. Steinbüchel N von, Real RGL, Sasse N, Wilson L, Otto C, Mullins R, et al. German validation of  
480 Quality of Life after Brain Injury (QOLIBRI) assessment and associated factors. *PLOS ONE*. 2017  
481 May 24;12(5):e0176668.
- 482 25. Wilson JL, Pettigrew LE, Teasdale GM. Structured interviews for the Glasgow Outcome Scale and  
483 the extended Glasgow Outcome Scale: guidelines for their use. *J Neurotrauma*. 1998;15(8):573–  
484 585.
- 485 26. Haagsma JA, Scholten AC, Andriessen TMJC, Vos PE, Van Beeck EF, Polinder S. Impact of  
486 depression and post-traumatic stress disorder on functional outcome and health-related quality  
487 of life of patients with mild traumatic brain injury. *J Neurotrauma*. 2015 Jun 1;32(11):853–62.

- 488 27. Cnossen MC, Scholten AC, Lingsma HF, Synnot A, Haagsma J, Steyerberg PEW, et al. Predictors of  
489 Major Depression and Posttraumatic Stress Disorder Following Traumatic Brain Injury: A  
490 Systematic Review and Meta-Analysis. *J Neuropsychiatry Clin Neurosci*. 2017;29(3):206–24.
- 491 28. Hu LT, Bentler PM, Kano Y. Can test statistics in covariance structure analysis be trusted? *Psychol*  
492 *Bull*. 1992 Sep;112(2):351–62.
- 493 29. Peters G-J, Dima A, Plass AM, Crutzen R, Gibbons C, Doyle F. Measurement in health psychology:  
494 combining theory, qualitative, and quantitative methods to do it right: 6th Methods in Health  
495 Psychology Symposium. *Eur Health Psychol*. 2016;18(6):235–246.
- 496 30. Guillemin F, Bombardier C, Beaton D. Cross-cultural adaptation of health-related quality of life  
497 measures: literature review and proposed guidelines. *J Clin Epidemiol*. 1993 Dec;46(12):1417–32.
- 498 31. Willis GB, Artino AR. What Do Our Respondents Think We're Asking? Using Cognitive  
499 Interviewing to Improve Medical Education Surveys. *J Grad Med Educ*. 2013 Sep;5(3):353–6.
- 500 32. van Kessel P, de Boer D, Hendriks M, Plass AM. Measuring patient outcomes in chronic heart  
501 failure: psychometric properties of the Care-Related Quality of Life survey for Chronic Heart  
502 Failure (CaReQoL CHF). *BMC Health Serv Res*. 2017 Aug 7;17(1):536.
- 503 33. Ajzen I. Nature and operation of attitudes. *Annu Rev Psychol*. 2001;52:27–58.
- 504

505 **Figure 1** Factors influencing the development of Post-Concussion Symptoms after TBI (2)

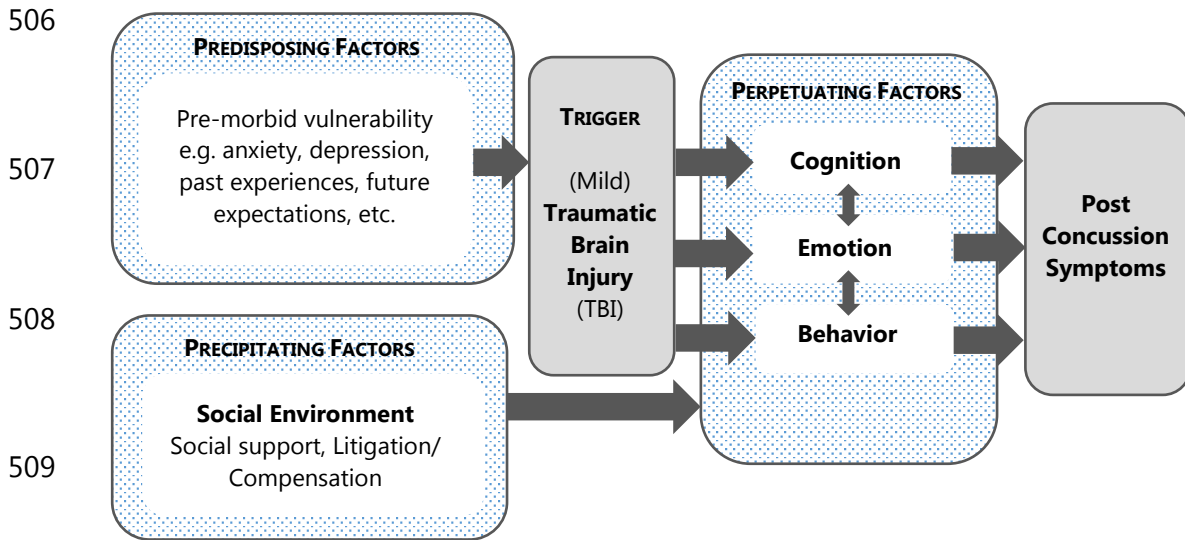

510

511

512 **Figure 2** Visual representation of factor loadings

513

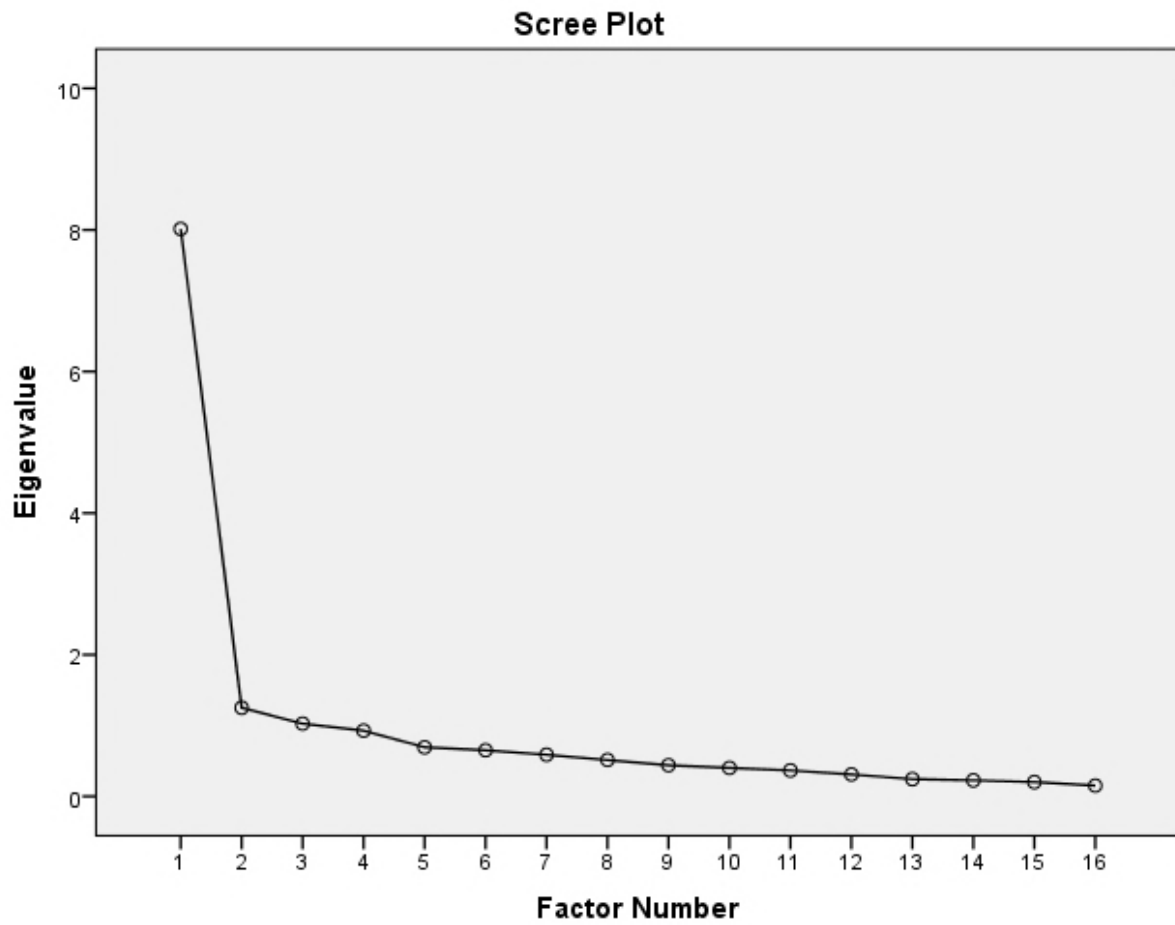

514

515

516

517  
518  
519

**Table 1 Overview of countries of birth of the respondents (N=447)**

|                                 |                     |                  |                    |                        |                       |
|---------------------------------|---------------------|------------------|--------------------|------------------------|-----------------------|
| Aruba<br>(N=1)                  | Brasil<br>(N=1)     | Germany<br>(N=2) | Indonesia<br>(N=4) | Morocco<br>(N=3)       | Surinam<br>(N=6)      |
| Bosnia and Herzegovina<br>(N=1) | China<br>(N=3)      | Spain<br>(N=1)   | Ireland<br>(N=1)   | Netherlands<br>(N=326) | Saint-Martin<br>(N=1) |
| Belgium<br>(N=59)               | Colombia<br>(N=1)   | UK<br>(N=3)      | Iran<br>(N=1)      | Slovenia<br>(N=1)      | Turkey<br>(N=3)       |
| Bermuda<br>(N=1)                | Cape Verde<br>(N=1) | Greece<br>(N=1)  | Italy<br>(N=1)     | Somalia<br>(N=1)       | Vietnam<br>(N=1)      |

520  
521  
522

523 **Table 2 Patient Demographics, presenting percentages and numbers**

| <b>Agegroup</b>  | <b>% NL (N)</b> | <b>% BE (N)</b> | <b>% Total (N)</b> |
|------------------|-----------------|-----------------|--------------------|
| <b>18 to 24</b>  | 12.9 (49)       | 5.9 (4)         | 11.9 (53)          |
| <b>25 to 34</b>  | 10.3 (39)       | 11.8 (8)        | 10.5 (47)          |
| <b>35 to 44</b>  | 8.2 (31)        | 16.2 (11)       | 9.4 (42)           |
| <b>45 to 54</b>  | 13.7 (52)       | 19.1 (13)       | 14.5 (65)          |
| <b>55 to 64</b>  | 23.2 (88)       | 25.0 (17)       | 23.5 (105)         |
| <b>65 to 74</b>  | 18.7 (71)       | 13.2 (9)        | 17.9 (80)          |
| <b>75 and up</b> | 12.9 (49)       | 8.8 (6)         | 12.3 (55)          |
| <b>Total (N)</b> | <b>379</b>      | <b>68</b>       | <b>447</b>         |

524

| <b>Employment Status</b>    | <b>% NL (N)</b> | <b>% BE (N)</b> | <b>% Total (N)</b> |
|-----------------------------|-----------------|-----------------|--------------------|
| <b>Working &gt;34hpw</b>    | 28.7 (118)      | 7.3 (30)        | 36.0 (148)         |
| <b>Working 20-34hpw</b>     | 9.2 (38)        | 1.2 (5)         | 10.5 (43)          |
| <b>Working &lt; 20hpw</b>   | 3.6 (15)        | .2 (1)          | 3.9 (16)           |
| <b>Currently sick leave</b> | 1.0 (4)         | -               | 1.0 (4)            |
| <b>Special Employment</b>   | .2 (1)          | -               | .2 (1)             |
| <b>Unemployed</b>           | 3.2 (13)        | .7 (3)          | 3.9 (16)           |
| <b>Unable to work</b>       | 2.2 (9)         | .7 (3)          | 2.9 (12)           |
| <b>Retired</b>              | 26.8 (110)      | 4.9 (20)        | 31.6 (130)         |
| <b>Student</b>              | 7.1 (29)        | .7 (3)          | 7.8 (32)           |
| <b>Homemaker</b>            |                 |                 | 2.2 (9)            |
| <b>Total (N)</b>            | <b>345</b>      | <b>66</b>       | <b>411</b>         |
| <b>Missing (N)</b>          | <b>34</b>       | <b>2</b>        | <b>36</b>          |

525

| <b>Education Level</b>     | <b>% NL (N)</b> | <b>% BE (N)</b> | <b>% Total (N)</b> |
|----------------------------|-----------------|-----------------|--------------------|
| <b>None, not in school</b> | .3 (1)          | .3 (1)          | .5 (2)             |
| <b>At school currently</b> | 2.8 (11)        | -               | 2.8 (11)           |
| <b>Primary education</b>   | 5.3 (21)        | 1.5 (6)         | 6.9 (27)           |
| <b>Secondary education</b> | 17.3 (68)       | 8.4 (33)        | 25.7 (101)         |
| <b>Post Highschool</b>     | 33.1 (130)      | 2.3 (9)         | 35.4 (139)         |
| <b>University/ College</b> | 24.7 (97)       | 4.1 (16)        | 28.8 (113)         |
| <b>Total (N)</b>           | <b>328</b>      | <b>65</b>       | <b>393</b>         |
| <b>Missing (N)</b>         | <b>51</b>       | <b>3</b>        | <b>54</b>          |

526

| <b>Marital staus</b>       | <b>% NL (N)</b> | <b>% BE (N)</b> | <b>% Total (N)</b> |
|----------------------------|-----------------|-----------------|--------------------|
| <b>Never Married</b>       | 23.6 (99)       | 3.6 (15)        | 27.2 (114)         |
| <b>Married</b>             | 41.3 (173)      | 7.9 (33)        | 49.2 (206)         |
| <b>Living Together</b>     | 5.5 (23)        | 1.9 (8)         | 7.4 (31)           |
| <b>Divorced/ Seperated</b> | 8.6 (36)        | 1.7 (7)         | 10.3 (43)          |
| <b>Widowed</b>             | 5.0 (21)        | .7 (3)          | 5.7 (24)           |
| <b>Total (N)</b>           | <b>352</b>      | <b>66</b>       | <b>418</b>         |
| <b>Missing (N)</b>         | <b>27</b>       | <b>2</b>        | <b>49</b>          |

527  
528  
529



530 **Table 3a TBI-related patient demographics, presenting percentages and numbers**  
531

| Type of hospital stay | % NL (N)         | % BE (N)         | % Total (N)      |
|-----------------------|------------------|------------------|------------------|
| <i>ER</i>             | 13 (58)          | .4 (2)           | 13.4 (60)        |
| <i>Admission</i>      | 47.0 (210)       | 5.6 (25)         | 52.6 (235)       |
| <i>ICU</i>            | 24.8 (111)       | 9.2 (41)         | 34.0 (152)       |
| <b>% Total (N)</b>    | <b>84.8(379)</b> | <b>15.2 (68)</b> | <b>100 (447)</b> |

532

| Initial Diagnosis              | % NL (N)   | % BE (N)  | % Total (N) |
|--------------------------------|------------|-----------|-------------|
| <i>Mild TBI (GCS 13-15)</i>    | 74.2 (267) | 13.6 (49) | 87.8 (316)  |
| <i>Moderate TBI (GCS 9-12)</i> | 5.0 (18)   | .8 (3)    | 5.8 (21)    |
| <i>Severe TBI (GCS 3-8)</i>    | 4.7 (17)   | 1.7 (6)   | 6.4 (23)    |
| <b>Total (N)</b>               | <b>302</b> | <b>58</b> | <b>360</b>  |
| <b>Missing (N)</b>             | <b>77</b>  | <b>10</b> | <b>87</b>   |

533

| Recovery Status at six months post TBI  | % NL (N)   | % BE (N)  | % Total (N) |
|-----------------------------------------|------------|-----------|-------------|
| <i>Good recovery (GOSE 7-8)</i>         | 65.1 (235) | 44.8 (13) | 60.3 (248)  |
| <i>Moderate Disabilities (GOSE 5-6)</i> | 28.3 (102) | 34.5 (10) | 26.2 (112)  |
| <i>Severe Disabilities (GOSE 3-4)</i>   | 6.6 (24)   | 20.7 (6)  | 7.7 (30)    |
| <b>Total (N)</b>                        | <b>361</b> | <b>29</b> | <b>390</b>  |
| <b>Missing (N)</b>                      | <b>18</b>  | <b>39</b> | <b>57</b>   |

534  
535  
536  
537 **Table 3b Patient recovery status at six months TBI by type of hospital stay and initial diagnosis**  
538

|                  | Initial Diagnosis (N)    | Good Recovery at six months post TBI % (N) | Moderate disability at six months post TBI % (N) | Severe disability at six months post TBI % (N) |
|------------------|--------------------------|--------------------------------------------|--------------------------------------------------|------------------------------------------------|
| <b>ER</b>        | <i>Mild TBI (53)</i>     | 14.7 (46)                                  | 2.2 (7)                                          | -                                              |
| <b>Admission</b> | <i>Mild TBI (180)</i>    | 44.4 (139)                                 | 9.3 (29)                                         | 3.8 (12)                                       |
|                  | <i>Moderate TBI (5)</i>  | .6 (2)                                     | 1.0 (3)                                          | -                                              |
|                  | <i>Severe TBI (2)</i>    | .6 (2)                                     | -                                                | -                                              |
| <b>ICU</b>       | <i>Mild TBI (43)</i>     | 5.4 (17)                                   | 7.3 (23)                                         | 1.0 (3)                                        |
|                  | <i>Moderate TBI (13)</i> | 4.2 (13)                                   | 4.2 (13)                                         | .03 (1)                                        |
|                  | <i>Severe TBI (17)</i>   | 1.6 (5)                                    | 3.2 (10)                                         | .6 (2)                                         |
| <b>Total</b>     | <b>313</b>               | <b>214</b>                                 | <b>81</b>                                        | <b>18</b>                                      |

539 Note: percentages are based on the 313 respondents of which all three datatypes could be retrieved.  
540

541 **Table 4** individual item descriptives and characteristics  
 542

| <i>RPQ item</i>                   | <i>Mean (SD)</i> | <i>Trimmed Mean</i> | <i>Skewness (Kurtosis)</i> | <i>Item-Total correlation</i> | <i>Alpha if item deleted</i> |
|-----------------------------------|------------------|---------------------|----------------------------|-------------------------------|------------------------------|
| 1. <i>Headaches</i>               | .93 (1.23)       | .81                 | 1.13 (.075)                | .57                           | .93                          |
| 2. <i>Dizziness</i>               | .88 (1.18)       | .76                 | 1.15 (.242)                | .57                           | .93                          |
| 3. <i>Nausea/ Vomiting</i>        | .28 (1.24)       | .8                  | 3.1 (9.5)                  | .46                           | .93                          |
| 4. <i>Noise sensitivity</i>       | .92 (1.24)       | .8                  | 1.18 (.28)                 | .66                           | .93                          |
| 5. <i>Sleep disturbance</i>       | 1.06 (1.28)      | .95                 | .94 (-.37)                 | .60                           | .93                          |
| 6. <i>Fatigue</i>                 | 1.76 (1.35)      | 1.73                | .11 (-1.23)                | .73                           | .93                          |
| 7. <i>Irritable</i>               | 1.04 (1.219)     | .93                 | .96 (-.075)                | .73                           | .93                          |
| 8. <i>Depressed</i>               | 1.0 (1.18)       | .89                 | .98 (-.09)                 | .72                           | .93                          |
| 9. <i>Frustrated</i>              | 1.1 (1.23)       | 1.0                 | .87 (-.32)                 | .77                           | .93                          |
| 10. <i>Poor memory</i>            | 1.4 (1.3)        | 1.3                 | .49 (-.93)                 | .74                           | .93                          |
| 11. <i>Poor concentration</i>     | 1.3 (1.25)       | 1.24                | .62 (-.68)                 | .79                           | .92                          |
| 12. <i>Taking longer to think</i> | 1.4 (1.28)       | 1.29                | .45 (-.98)                 | .75                           | .93                          |
| 13. <i>Blurred vision</i>         | .67 (1.05)       | .55                 | 1.57 (1.63)                | .55                           | .93                          |
| 14. <i>Light sensitivity</i>      | .55 (.97)        | .42                 | 1.92 (3.08)                | .60                           | .93                          |
| 15. <i>Double vision</i>          | .4 (.9)          | .25                 | 2.57 (6.18)                | .43                           | .93                          |
| 16. <i>Restlessness</i>           | .95 (1.17)       | .84                 | 1.06 (.107)                | .78                           | .93                          |

543  
 544 *Note: N=439; the number of missing values was 8, the minimum value 0, and the maximum value 4 for all items*  
 545
